# Supplementary material for: Expanding the use of salivary cortisol as a non-invasive outpatient test in the dynamic evaluation of suspected adrenal insufficiency
Source: PubMed Central journal article supplement (PMC10083658; doi:10.1530/ec-23-0004), 2023-03-28
Supplement: supplementary_table_1.pdf [file supplementary_table_1.pdf]

| <b>Supplementary Table 1: Literature Review of Studies Assessing Salivary Cortisol in AST</b> |                                                          |                                                                                                                                                                                                                               |                                                                                                                                                          |                                |                                                         |                                                                                                                      |
|-----------------------------------------------------------------------------------------------|----------------------------------------------------------|-------------------------------------------------------------------------------------------------------------------------------------------------------------------------------------------------------------------------------|----------------------------------------------------------------------------------------------------------------------------------------------------------|--------------------------------|---------------------------------------------------------|----------------------------------------------------------------------------------------------------------------------|
| <b>Study</b>                                                                                  | <b>Participants</b>                                      | <b>ACTH Stimulation Test (AST) Protocol</b>                                                                                                                                                                                   | <b>Serum Cortisol Assay and Cut-off</b>                                                                                                                  | <b>Salivary Cortisol Assay</b> | <b>Relationship between Serum and Salivary Cortisol</b> | <b>Salivary Cortisol Cut-off</b>                                                                                     |
| <b>Albert, 2019.</b> <sup>30</sup>                                                            | 45 healthy volunteers, 39 AI, 39 decompensated cirrhosis | <ul style="list-style-type: none"> <li>• IV 250mcg AST</li> <li>• Serum and salivary cortisol measured at 0, 30, 60, 90 minutes</li> </ul>                                                                                    | Roche immunoassay; Serum cortisol > 248 nmol/L at 0 minutes, > 497 nmol/L at 60 minutes, or increase between 0 minute and 60 minute samples > 248 nmol/L | Electrochemiluminescence assay | R=0.79, P<0.01                                          | 0 minute < 2.2 nmol/L<br>60 minutes < 39.5 nmol/L<br>Rise in salivary cortisol < 27.6 nmol/L<br>(Sn/Sp not reported) |
| <b>Chao, 2019.</b> <sup>31</sup>                                                              | 21 healthy children                                      | <ul style="list-style-type: none"> <li>• IV or IM 250mcg AST</li> <li>• Serum and salivary cortisol measured at 0 and 45 minutes</li> </ul>                                                                                   | Immunoassay; Complete AI: peak serum cortisol < 275 nmol/L<br>Partial AI: peak serum cortisol 275 - 497 nmol/L                                           | LC-MS                          | R <sup>2</sup> =0.96                                    | Peak salivary cortisol >13.8 nmol/L<br>(sensitivity 100%, specificity 100%)                                          |
| <b>Contreras, 2004.</b> <sup>26</sup>                                                         | 21 healthy volunteers, 19 AI                             | <ul style="list-style-type: none"> <li>• IM 12.5mcg, 25mcg, 250mcg AST</li> <li>• Serum cortisol measured at 0 and 30 minutes</li> <li>• Salivary cortisol measured at 0, 15, 30, 45, 60, 75, 90, 105, 120 minutes</li> </ul> | Radio-immunoassay; Serum cortisol ≥ 552nmol/L                                                                                                            | Radio-immunoassay              | R=0.099, P=0.665                                        | Salivary cortisol >20 nmol/L 30 minutes after AST (based on healthy subjects; Sn/Sp not reported)                    |
| <b>Cornes, 2015</b> <sup>16</sup>                                                             | 36 suspected AI                                          | <ul style="list-style-type: none"> <li>• AST performed in afternoon</li> </ul>                                                                                                                                                | Roche immunoassay                                                                                                                                        | LC-MS                          | R <sup>2</sup> =0.6037                                  | Peak salivary cortisol ≥15nmol/L                                                                                     |

|                                         |                              |                                                                                                                                                                                                                   |                                                             |                          |                    |                                                                                                                                                        |
|-----------------------------------------|------------------------------|-------------------------------------------------------------------------------------------------------------------------------------------------------------------------------------------------------------------|-------------------------------------------------------------|--------------------------|--------------------|--------------------------------------------------------------------------------------------------------------------------------------------------------|
|                                         |                              | <ul style="list-style-type: none"> <li>• IV 250mcg AST</li> <li>• Serum and salivary cortisol measured at 30 and 60 minutes</li> </ul>                                                                            | Peak serum cortisol $\geq$ 550nmol/L                        |                          |                    | (Sn/Sp not reported)                                                                                                                                   |
| <b>Deutschbein, 2009.</b> <sup>25</sup> | 21 healthy volunteers, 55 AI | <ul style="list-style-type: none"> <li>• IV 250mcg AST</li> <li>• Serum and salivary cortisol measured at 0, 30, 60, 90, 120 minutes</li> </ul>                                                                   | Centaur immunoassay; ITT peak cortisol $\geq$ 500 nmol/L    | Radio-immunoassay        | R=0.88 $P<0.001$   | Salivary cortisol at 30 minutes: $>32.5$ nmol/L (sensitivity 72%; specificity 86%)                                                                     |
| <b>Duřková, 2016.</b> <sup>17</sup>     | 15 healthy men               | <ul style="list-style-type: none"> <li>• IV 1, 10, 250mcg AST</li> <li>• ITT</li> </ul>                                                                                                                           | LC-MS                                                       | LC-MS                    | NA                 | Peak salivary cortisol $\geq 12.5$ nmol/L (healthy subjects)                                                                                           |
| <b>Elbuken, 2014.</b> <sup>32</sup>     | 44 healthy volunteers        | <ul style="list-style-type: none"> <li>• IV 1, 250mcg AST</li> <li>• Serum and salivary cortisol measured at 0, 30, 60 minutes (for 1mcg AST) and 0, 30, 60, 90 minutes (for 250mcg AST)</li> </ul>               | Radio-immunoassay                                           | Immunoassay              | NA                 | Peak salivary cortisol $\geq 5.8$ nmol/L (1mcg AST) or $\geq 23.4$ nmol/L (250mcg AST) (healthy subjects)                                              |
| <b>Elder, 2018.</b> <sup>18</sup>       | 35 healthy volunteers        | <ul style="list-style-type: none"> <li>• IV 1, 250mcg AST</li> <li>• 1mg dexamethasone given the night before and morning of AST</li> <li>• Serum and salivary cortisol measured from 0 to 120 minutes</li> </ul> | Abbott Architect immunoassay                                | LC-MS                    | R=0.82, $P<0.001$  | NA                                                                                                                                                     |
| <b>George, 2020.</b> <sup>29</sup>      | 67 suspected AI              | <ul style="list-style-type: none"> <li>• IM 30u porcine corticotrophin</li> <li>• Salivary cortisol measured at 0, 60, 120 minutes</li> </ul>                                                                     | Roche II immunoassay; peak serum cortisol $\geq 500$ nmol/L | Electrochemiluminescence | R=0.88, $P<0.001$  | Peak salivary cortisol: 60 mins: $>18.5$ nmol/L (sensitivity 97%, specificity 97%); 120 minutes: $> 29.3$ nmol/L (sensitivity 100%, specificity 93.4%) |
| <b>Kim, 2020.</b> <sup>23</sup>         | 120 suspected AI             | <ul style="list-style-type: none"> <li>• IV 250mcg AST</li> <li>• Serum and salivary cortisol at 0, 30, 60</li> </ul>                                                                                             | Packard Cobra Gamma Counter analyzer RIA;                   | EIA (Salimetrics)        | R=0.750, $P<0.001$ | Peak salivary cortisol $>13.2$ nmol/L (sensitivity 90.7%; specificity 94.1%).                                                                          |

|                                            |                                                                     |                                                                                                                                        |                                                                           |                   |                               |                                                                                                                                |
|--------------------------------------------|---------------------------------------------------------------------|----------------------------------------------------------------------------------------------------------------------------------------|---------------------------------------------------------------------------|-------------------|-------------------------------|--------------------------------------------------------------------------------------------------------------------------------|
|                                            |                                                                     | mins                                                                                                                                   | serum cortisol >496.8 nmol/L                                              |                   |                               |                                                                                                                                |
| <b>Kosák, 2014.</b> <sup>27</sup>          | 84 suspected AI                                                     | <ul style="list-style-type: none"> <li>• IV 250mcg AST</li> <li>• Serum and salivary cortisol at 0, 30, 60 minutes</li> </ul>          | Radio-immunoassay; Peak cortisol > 500 nmol/L                             | Immunoassay       | R=0.773, P<0.001              | Peak salivary cortisol >27.54 nmol/L (Sn/Sp not reported)                                                                      |
| <b>Langelaan, 2018.</b> <sup>19</sup>      | 129 suspected AI                                                    | <ul style="list-style-type: none"> <li>• IV 250mcg AST</li> <li>• Serum and salivary cortisol measured at 0, 30, 60 minutes</li> </ul> | Roche immunoassay<br>Cortisol 1: ≥ 550 nmol/L<br>Cortisol 2: ≥ 420 nmol/L | LC-MS             | NA                            | Peak salivary cortisol:<br>0 minutes: ≥5.9 nmol/L<br>30 minutes: ≥17.2 nmol/L<br>60 minutes: ≥15.6 nmol/L (Sn/Sp not reported) |
| <b>Mak, 2017.</b> <sup>20</sup>            | 56 healthy volunteers<br>171 suspected AI                           | <ul style="list-style-type: none"> <li>• IV 1mcg AST</li> <li>• Serum and salivary cortisol measured at 0, 30, 60 minutes</li> </ul>   | Abbott Architect immunoassay<br>Peak serum cortisol ≥376 nmol/L           | LC-MS             | R=0.779                       | Peak salivary cortisol ≥8.6 nmol/L (sensitivity 84.7%, specificity=94.6%)                                                      |
| <b>Marcus-Perlman, 2006.</b> <sup>28</sup> | 14 healthy volunteers, 14 women (pregnant or on OCP), 10 AI         | <ul style="list-style-type: none"> <li>• IV 1mcg AST</li> <li>• Serum and salivary cortisol at 0, 30, 60 minutes</li> </ul>            | Roche immunoassay; peak cortisol > 496.8 nmol/L                           | Radio-immunoassay | R=0.74                        | Serum cortisol at 30 minutes >24.28 nmol/L (Sn/Sp not reported)                                                                |
| <b>Nolan, 2017.</b> <sup>21</sup>          | 24 healthy volunteers<br>10 healthy women on OCP<br>87 suspected AI | <ul style="list-style-type: none"> <li>• IV 250mcg AST</li> <li>• Serum and salivary cortisol measured at 0, 30, 60 minutes</li> </ul> | Beckman DxI800 immunoassay; peak serum cortisol ≥500 nmol/L               | LC-MS             | NA                            | Peak salivary cortisol ≥26 nmol/L (Sn/Sp not reported)                                                                         |
| <b>Perogamvros, 2010.</b> <sup>22</sup>    | 78 suspected AI                                                     | <ul style="list-style-type: none"> <li>• IM 250mcg AST (n=68)</li> <li>• ITT (n=10)</li> </ul>                                         | Siemens Centaur immunoassay; Peak serum cortisol >500 nmol/L              | LC-MS             | R <sup>2</sup> =0.83, P<0.001 | Peak salivary cortisol >8.3 nmol/L (sensitivity 100%, specificity 100%)                                                        |

|                                                                                                                                                      |                                                               |                                                                                                                                |                                                                       |                           |    |    |
|------------------------------------------------------------------------------------------------------------------------------------------------------|---------------------------------------------------------------|--------------------------------------------------------------------------------------------------------------------------------|-----------------------------------------------------------------------|---------------------------|----|----|
| <b>Raff, 2008.</b> <sup>33</sup>                                                                                                                     | 28 hospitalised patients with low serum albumin, suspected AI | <ul style="list-style-type: none"> <li>• IV 5mcg or 250mcg AST</li> <li>• Serum and salivary cortisol at 30 minutes</li> </ul> | Centaur immunoassay; serum cortisol > 497 nmol/L 30 minutes after AST | Enzyme-linked immunoassay | NA | NA |
| <p>AI: adrenal insufficiency<br/> OCP: oral contraceptive pills<br/> EIA: enzyme immunoassay<br/> LC-MS: liquid chromatography mass spectrometry</p> |                                                               |                                                                                                                                |                                                                       |                           |    |    |
